# Supplementary material for: Rigid bolaform surfactant templated mesoporous silicon nanofibers as anode materials for lithium-ion batteries
Source: Royal Society of Chemistry journal article supplement (doi:10.1039/c4ta04088k), 2014-01-01
Supplement: c4ta04088k1.pdf [file c4ta04088k1.pdf]

## Supporting information

### Rigid Bolaform Surfactant Templated Mesoporous Silicon Nanofiber for Lithium Energy Storage

Dongpo Xu, Zhehao Huang, Rongrong Miao, Yitian Bie, Jun Yang\*, Yaoyuan\* and Shunai Che\*

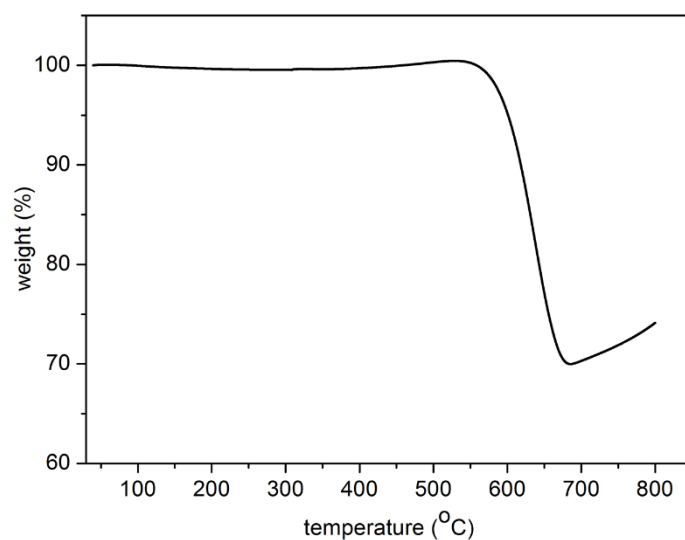

Figure S1. Thermogravimetric curve of the nf-Si@C.

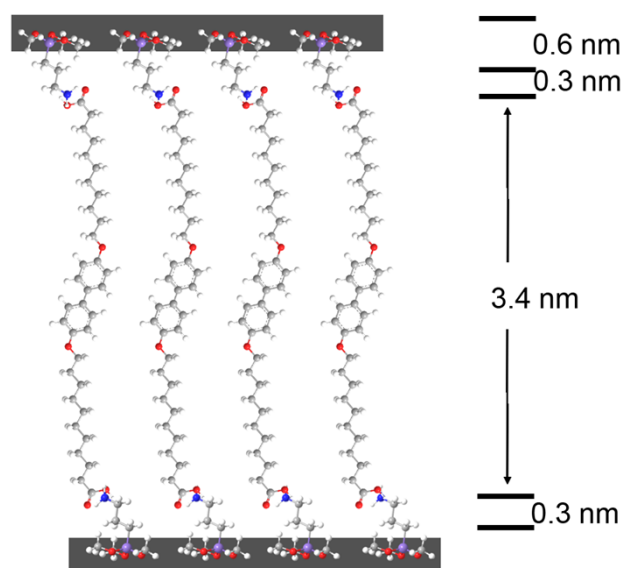

Figure S2. Possible packing configuration of the surfactants in the lamellar silica framework.

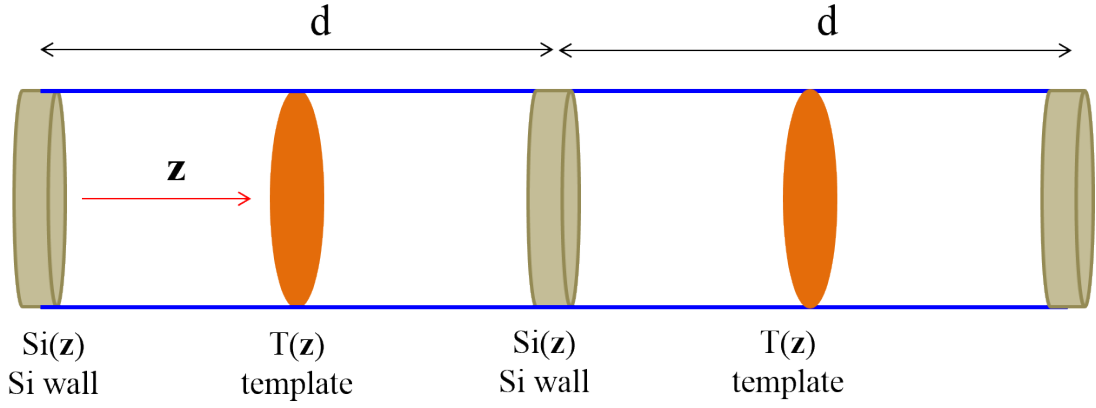

Figure S3. The mechanism to explain the Low-XRD pattern of the as-synthesized silica nanotube.

Assuming that the electron density accumulates at the center of silica wall and center of the template, and the scattering factors are  $Si(z)$  and  $T(z)$  respectively, then:

For 1D crystal,  $C(\mathbf{r}) = \{B(\mathbf{z}) \cdot H(x, y)\} * \{L(\mathbf{z}) \cdot S(\mathbf{z})\}$

Herein,  $B(\mathbf{z}) = Si(\mathbf{z}) + T(\mathbf{z})$ ;

The structure factor in the reciprocal space,

$F(C(\mathbf{r})) = F(Si(\mathbf{z}) + T(\mathbf{z})) \cdot F(L(\mathbf{z})) * F(S(\mathbf{z}))$ , therefore,

$$F(\mathbf{k}) = f_{si}(\mathbf{k})e^{(2\pi i \mathbf{k} \cdot \mathbf{z})} + f_{template}(\mathbf{k})e^{(2\pi i \mathbf{k} \cdot (\mathbf{z} + \mathbf{d}/2))}$$

The first reflection:

$$F_{1st} = [f_{si}(\mathbf{k}) - f_{template}(\mathbf{k})]$$

The second reflection:

$$F_{2nd} = [f_{si}(\mathbf{k}) + f_{template}(\mathbf{k})]$$

When  $f_{si}(\mathbf{k}) = f_{template}(\mathbf{k})$ , the intensity of the first peak will be zero. This can be regarded as lattice centering, which is different from the accidental extinction.
